# Supplementary material for: A chiral coordination polymer containing copper(i) iodide layer composed of intersecting [CuI]n helices
Source: Royal Society of Chemistry journal article supplement (doi:10.1039/b511708a), 2005-01-01
Supplement: b511708a.pdf [file b511708a.pdf]

## Supplementary Information

### A Chiral Coordination Polymer Containing Copper Iodide Layer Composed of Intersecting $[\text{CuI}]_n$ Helices

Rong Peng, Tao Wu, Dan Li\*

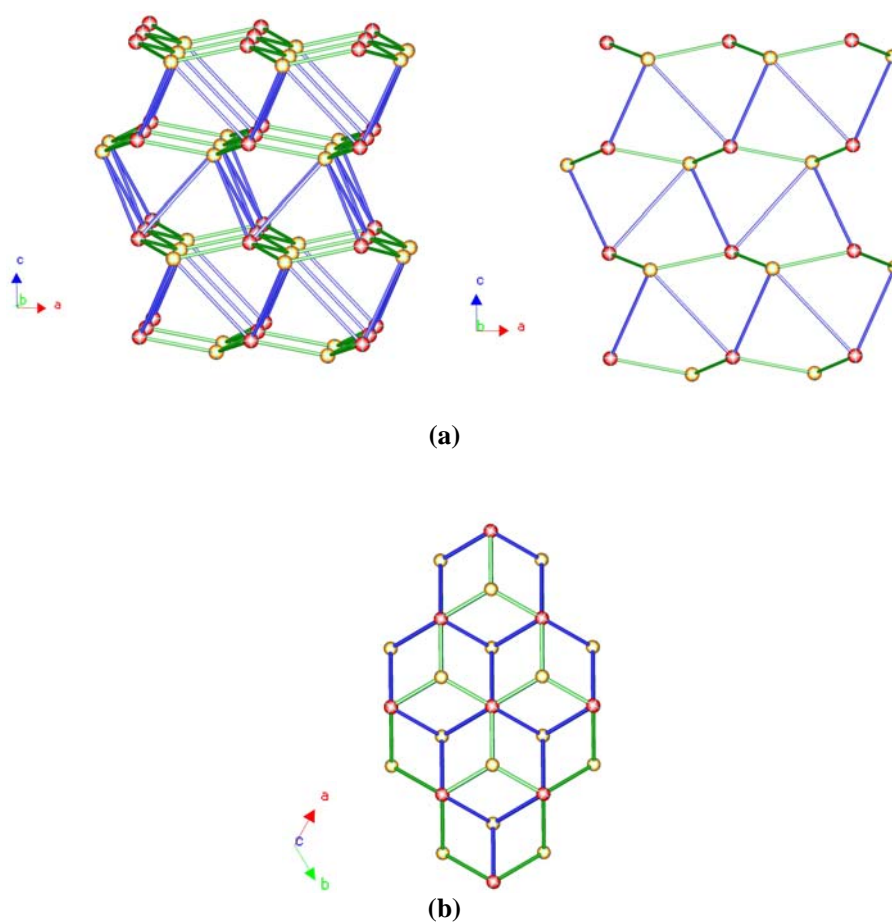

**Figure S1.** The schematic representation of  $\{[\text{Cu}_6(\text{L})_3\text{I}_5]^+\}_n$  view along the  $[100]$  (a),  $[001]$  (b) direction showing the honeycomb (6,3) topology. The yellow and red balls represent up- $\text{ICu}_3$  and down- $\text{ICu}_3$  junctions, the green and blue lines represent  $\mu_2\text{-I}$  and  $\text{L}$ , respectively.

\* Department of Chemistry, Shantou University, Guangdong 515063, P. R. China. E-mail: dli@stu.edu.cn
